# Supplementary material
Source: PubMed Central journal article supplement (PMC8184122)
Supplement: NIHMS1691042-supplement-Supp_1.pdf [file NIHMS1691042-supplement-Supp_1.pdf]

## Supplemental Online Content

Arastu A, Patel A, Mohile SG, et al. Assessment of financial toxicity among older adults with advanced cancer. *JAMA Netw Open*. 2020;3(12):e2025810.  
doi:10.1001/jamanetworkopen.2020.25810

**eTable 1.** The Association of Medication Delay (At Any Time in the Past Three Months Have You Taken Less Medication Than Was Prescribed for You Because of the Cost?) (DelayMed) With Depression, Anxiety, Emotional Distress, and Quality of Life

**eTable 2.** The Association of Income Available for Basic Needs (When You Think About the Amount of Income That You Have Available in a Typical Month, Is There Enough for Your Food and Housing Costs?) (IncomeAvail) With Depression, Anxiety, Emotional Distress, and Quality of Life

**eTable 3.** The Association of Income Available for Other Needs (When You Think About the Amount of Income That You Have Available in a Typical Month, Is It Enough for Things You Really Need Like Clothing, Medicine, Repairs to the Home or Transportation?) (Enough) With Depression, Anxiety, Emotional Distress, and Quality of Life

This supplemental material has been provided by the authors to give readers additional information about their work.

**eTable 1. The association of medication delay (At any time in the past three months have you taken less medication than was prescribed for you because of the cost?) (DelayMed) with depression, anxiety, emotional distress, and quality of life.**

| Independent variables                                                 | Depression (GDS)<br>Coefficient (95% CI) | Anxiety (GAD-7)<br>Coefficient (95% CI) | Distress (ED)<br>Coefficient (95% CI) | Quality of life (FACT-G)<br>Coefficient (95% CI) |
|-----------------------------------------------------------------------|------------------------------------------|-----------------------------------------|---------------------------------------|--------------------------------------------------|
| <b>Patient demographics</b>                                           |                                          |                                         |                                       |                                                  |
| <b>Med delay</b>                                                      | <b>1.48 (0.15, 2.82)^</b>                | <b>1.57 (-0.36, 3.50)</b>               | <b>2.02 (0.7, 3.33)^</b>              | <b>-6.7 (-13.84, 0.44)</b>                       |
| Gender (vs. male)                                                     | -0.23 (-0.71, 0.25)                      | 0.42 (-0.28, 1.11)                      | 0.26 (-0.21, 0.74)                    | 1.24 (-1.36, 3.83)                               |
| Ethnicity (vs. Hispanic)                                              |                                          |                                         |                                       |                                                  |
| Non-Hispanic/ Latino                                                  | 1.86 (-3.62, 7.34)                       | 2.17 (-5.72, 10.06)                     | -1.05 (-6.44, 4.34)                   | -6.36 (-35.57, 22.85)                            |
| Unknown                                                               | 3.22 (-2.81, 9.25)                       | 3.05 (-5.63, 11.73)                     | -1.04 (-6.98, 4.89)                   | -9.35 (-41.49, 22.79)                            |
| Race (vs. White)                                                      |                                          |                                         |                                       |                                                  |
| Black/African American                                                | -0.11 (-1.04, 0.83)                      | 0.08 (-1.27, 1.43)                      | -0.82 (-1.75, 0.12)                   | 3.44 (-1.68, 8.56)                               |
| Other                                                                 | -0.88 (-2.36, 0.60)                      | -1.92 (-4.05, 0.21)                     | -1.08 (-2.54, 0.38)                   | 1.48 (-6.42, 9.37)                               |
| Insurance (vs. Medicare)                                              |                                          |                                         |                                       |                                                  |
| (Medicare+Private) OR<br>(Medicare+Private+Health<br>Savings Account) | -0.42 (-1.04, 0.19)                      | -0.27 (-1.16, 0.61)                     | -0.45 (-1.06, 0.16)                   | 2.77 (-0.56, 6.10)                               |
| (Medicaid+Medicare) OR<br>(Medicaid+Private)                          | -0.26 (-1.47, 0.94)                      | -0.82 (-2.56, 0.91)                     | -0.55 (-1.74, 0.64)                   | 0.07 (-6.46, 6.59)                               |
| Private OR Veterans Affairs                                           | -0.66 (-1.85, 0.54)                      | -0.15 (-1.87, 1.57)                     | -0.28 (-1.48, 0.91)                   | -0.90 (-7.39, 5.58)                              |
| Income (vs. <\$20,000)                                                |                                          |                                         |                                       |                                                  |
| \$20-50,000                                                           | -0.68 (-1.49, 0.13)                      | 0.12 (-1.56, 1.81)                      | -0.59 (-1.40, 0.21)                   | 4.16 (-0.23, 8.55)                               |
| \$50-100,000                                                          | -0.67 (-1.56, 0.21)                      | -0.52 (1.70, 0.65)                      | -0.47 (-1.34, 0.41)                   | 7.03 (2.27, 11.78)*                              |
| >\$100,000                                                            | -0.49 (-1.66, 0.68)                      | -0.54 (-1.81, 0.72)                     | -0.71 (-1.88, 0.45)                   | 1.75 (-4.52, 8.02)                               |
| Declined to answer                                                    | -0.44 (-1.56, 0.21)                      | -1.06 (-2.33, 0.22)                     | -0.82 (-1.69, 0.05)                   | 3.51 (-1.26, 8.28)                               |

Note: Higher scores for the GDS-7, GAD-7, and ED indicate greater depression, greater anxiety, and greater emotional distress; while higher scores on the FACT-G indicate greater quality of life.

^p-value<0.05, \*p-value<0.01; \*\*p-value<0.001

Abbreviations: ED - Emotional Distress Thermometer; FACT-G - Functional Assessment of Cancer Therapy-General; GAD-7 - Generalized Anxiety Disorder-7 Item Scale; GDS - Geriatric Depression Scale

Only patient covariates significant in bivariate analyses with the primary predictor of interest (FT3; p<0.10) were included in the final model

**eTable 2. The association of income available for basic needs (When you think about the amount of income that you have available in a typical month, is there enough for your food and housing costs?) (IncomeAvail) with depression, anxiety, emotional distress, and quality of life.**

| Independent variables                                                 | Depression (GDS)<br>Coefficient (95%CI) | Anxiety (GAD-7)<br>Coefficient (95%CI) | Distress (ED)<br>Coefficient (95%CI) | Quality of life (FACT-G)<br>Coefficient (95%CI) |
|-----------------------------------------------------------------------|-----------------------------------------|----------------------------------------|--------------------------------------|-------------------------------------------------|
| <b>Patient Demographics</b>                                           |                                         |                                        |                                      |                                                 |
| <b>Income Available</b>                                               | <b>1.70 (2.73, 4.83)**</b>              | <b>1.74 (0.42, 3.05)*</b>              | <b>1.10 (0.19, 2.01)^</b>            | <b>-4.33 (-9.40, 0.75)</b>                      |
| Education (vs. <High school)                                          |                                         |                                        |                                      |                                                 |
| High school graduate                                                  | 0.01 (-0.78, 0.79)                      | -0.22 (-1.36, 0.92)                    | -0.32 (-1.11, 0.47)                  | 0.02 (-4.32, 4.35)                              |
| Some college or above                                                 | -0.55 (-1.35, 0.24)                     | -1.19 (-2.33, -0.04)                   | -0.57 (-1.36, 0.23)                  | 1.80 (-2.56, 6.16)                              |
| Insurance (vs. Medicare)                                              |                                         |                                        |                                      |                                                 |
| (Medicare+Private) OR<br>(Medicare+Private+Health Savings<br>Account) | -0.34 (-0.95, 0.28)                     | 0.03 (-0.85, 0.92)                     | -0.34 (-0.95, 0.27)                  | 2.90 (-0.46, 6.25)                              |
| (Medicaid+Medicare) OR<br>(Medicaid+Private)                          | -0.28 (-1.49, 0.93)                     | -0.37 (-2.06, 1.33)                    | -0.59 (-1.80, 0.61)                  | 0.40 (6.24, 7.04)                               |
| Private OR Veterans Affairs                                           | -0.80 (-1.98, 0.38)                     | -0.08 (-0.84, 0.68)                    | -0.45 (-1.64, 0.74)                  | -0.20 (-6.66, 6.27)                             |
| Income (vs. <\$20,000)                                                |                                         |                                        |                                      |                                                 |
| \$20-50,000                                                           | -0.34 (-1.17, 0.50)                     | 0.56 (-1.24, 2.35)                     | -0.31 (-1.15, 0.53)                  | 3.18 (-1.37, 7.73)                              |
| \$50-100,000                                                          | -0.19 (-1.13, 0.75)                     | -0.38 (1.59, 0.82)                     | -0.17 (-1.11, 0.78)                  | 5.84 (0.70, 10.99)                              |
| >\$100,000                                                            | 0.11 (-1.13, 1.35)                      | -0.46 (-1.76, 0.83)                    | -0.36 (-1.61, 0.89)                  | 0.14 (-6.59, 6.87)                              |
| Declined to answer                                                    | -0.03 (-0.92, 0.87)                     | -0.78 (-2.14, 0.58)                    | -0.60 (-1.50, 0.29)                  | 2.40 (-2.53, 7.32)                              |
| Marital status (vs. Married)                                          |                                         |                                        |                                      |                                                 |
| Single                                                                | -0.08 (-0.61, 0.44)                     | -0.08 (-0.84, 0.68)                    | 0.04 (-0.48, 0.56)                   | 0.67 (-2.19, 3.53)                              |

Note: Higher scores for the GDS-7, GAD-7, and ED indicate greater depression, greater anxiety, and greater emotional distress; while higher scores on the FACT-G indicate greater quality of life.

^p-value<0.05, \*p-value<0.01; \*\*p-value<0.001

Abbreviations: ED - Emotional Distress Thermometer; FACT-G - Functional Assessment of Cancer Therapy-General; GAD-7 - Generalized Anxiety Disorder-7 Item Scale; GDS - Geriatric Depression Scale

Only patient covariates significant in bivariate analyses with the primary predictor of interest (FT3; p<0.10) were included in the final model

**eTable 3: The association of income available for other needs (When you think about the amount of income that you have available in a typical month, is it enough for things you really need like clothing, medicine, repairs to the home or transportation?) (Enough) with depression, anxiety, emotional distress, and quality of life.**

| Independent variables                                                 | Depression (GDS)<br>Coefficient (95% CI) | Anxiety (GAD-7)<br>Coefficient (95% CI) | Distress (ED)<br>Coefficient (95% CI) | Quality of life (FACT-G)<br>Coefficient (95% CI) |
|-----------------------------------------------------------------------|------------------------------------------|-----------------------------------------|---------------------------------------|--------------------------------------------------|
| <b>Patient Demographics</b>                                           |                                          |                                         |                                       |                                                  |
| <b>Enough</b>                                                         | <b>0.93 (0.24, 1.1)*</b>                 | <b>1.73 (0.75, 2.71)**</b>              | <b>0.81 (0.13, 1.49)^</b>             | <b>-6.13 (-9.87, -2.38)*</b>                     |
| Education (vs. <High school)                                          |                                          |                                         |                                       |                                                  |
| High school graduate                                                  | 0.01 (-0.79, 0.81)                       | -0.27 (-1.41, 0.87)                     | -0.38 (-1.17, 0.42)                   | -0.11 (-4.43, 4.21)                              |
| Some college or above                                                 | -0.56 (-1.36, 0.24)                      | -1.25 (-2.39, -0.11)^                   | -0.59 (-1.39, 0.20)                   | 1.95 (-2.38, 6.29)                               |
| Marital status (vs. married)                                          |                                          |                                         |                                       |                                                  |
| Single                                                                | -0.06 (-0.61, 0.50)                      | -0.28 (-1.07, 0.51)                     | -0.10 (-0.65, 0.45)                   | 0.51 (-2.47, 3.49)                               |
| Gender (vs. male)                                                     | -0.19 (-0.69, 0.32)                      | 0.39 (-0.33, 1.11)                      | 0.29 (-0.21, 0.79)                    | 1.05 (-1.67, 3.76)                               |
| Race (vs. White)                                                      |                                          |                                         |                                       |                                                  |
| Black/African American                                                | -0.33 (-1.24, 0.59)                      | -0.10 (-1.41, 1.20)                     | -0.78 (-1.70, 0.13)                   | 3.76 (-1.21, 8.73)                               |
| Other                                                                 | -0.71 (-2.17, 0.76)                      | -1.88 (-3.97, 0.21)                     | -0.91 (-2.35, 0.53)                   | 1.24 (-6.55, 9.03)                               |
| Insurance (vs. Medicare)                                              |                                          |                                         |                                       |                                                  |
| (Medicare+Private) OR<br>(Medicare+Private+Health Savings<br>Account) | -0.37 (-0.98, 0.25)                      | 0.05 (-0.83, 0.93)                      | -0.37 (-0.98, 0.24)                   | 2.62 (-0.71, 5.95)                               |
| (Medicaid+Medicare) OR<br>(Medicaid+Private)                          | -0.47 (-1.68, 0.75)                      | -0.98 (-2.72, 0.75)                     | -0.69 (-1.89, 0.51)                   | 0.94 (-5.61, 7.50)                               |
| Private OR Veterans Affairs                                           | -0.78 (-1.97, 0.41)                      | -0.22 (-1.91, 1.48)                     | -0.40 (-1.59, 0.79)                   | -0.14 (-6.57, 6.29)                              |
| Income (vs. <\$20,000)                                                |                                          |                                         |                                       |                                                  |
| \$20-50,000                                                           | -0.34 (-1.19, 0.52)                      | 1.07 (-0.75, 2.90)                      | -0.21 (-1.07, 0.64)                   | 1.93 (-2.69, 6.56)                               |
| \$50-100,000                                                          | -0.19 (-1.17, 0.79)                      | -0.08 (-1.30, 1.14)                     | -0.02 (-1.00, 0.96)                   | 4.12 (-1.180, 9.42)                              |
| >\$100,000                                                            | 0.15 (-1.13, 1.43)                       | -0.05 (-1.38, 1.27)                     | -0.20 (-1.48, 1.08)                   | -1.72 (-8.59, 5.15)                              |
| Declined to answer                                                    | 0.02 (-0.91, 0.95)                       | -0.34 (-1.74, 1.06)                     | -0.46 (-1.38, 0.47)                   | 0.76 (-4.28, 5.81)                               |

Note: Higher scores for the GDS-7, GAD-7, and ED indicate greater depression, greater anxiety, and greater emotional distress; while higher scores on the FACT-G indicate greater quality of life.

^p-value<0.05, \*p-value<0.01; \*\*p-value<0.001

Abbreviations: ED - Emotional Distress Thermometer; FACT-G - Functional Assessment of Cancer Therapy-General; GAD-7 - Generalized Anxiety Disorder-7 Item Scale; GDS - Geriatric Depression Scale

Only patient covariates significant in bivariate analyses with the primary predictor of interest (FT3; p<0.10) were included in the final model
